## CORRECTION

# Correction: PCC0208025 (BMS202), a small molecule inhibitor of PD-L1, produces an antitumor effect in B16-F10 melanoma-bearing mice

The *PLOS ONE* Staff

## Notice of republication

This article was republished on April 8, 2021, to correct errors in the Data Availability Statement that were introduced during the typesetting process. The publisher apologizes for the errors. Please download this article again to view the correct version. The originally published, uncorrected article and the republished, corrected articles are provided here for reference.

## Supporting information

**S1 File. Originally published, uncorrected article.**

(PDF)

**S2 File. Republished, corrected article.**

(PDF)

## Reference

1. Hu Z, Yu P, Du G, Wang W, Zhu H, Li N, et al. (2020) PCC0208025 (BMS202), a small molecule inhibitor of PD-L1, produces an antitumor effect in B16-F10 melanoma-bearing mice. *PLoS ONE* 15(3): e0228339. <https://doi.org/10.1371/journal.pone.0228339> PMID: 32214351

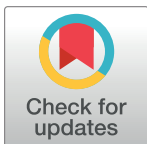

## OPEN ACCESS

**Citation:** The *PLOS ONE* Staff (2021) Correction: PCC0208025 (BMS202), a small molecule inhibitor of PD-L1, produces an antitumor effect in B16-F10 melanoma-bearing mice. *PLoS ONE* 16(4): e0251020. <https://doi.org/10.1371/journal.pone.0251020>

**Published:** April 28, 2021

**Copyright:** © 2021 The PLOS ONE Staff. This is an open access article distributed under the terms of the [Creative Commons Attribution License](https://creativecommons.org/licenses/by/4.0/), which permits unrestricted use, distribution, and reproduction in any medium, provided the original author and source are credited.
